# Supplementary material for: Using eDNA sampling for species-specific fish detection in tropical oceanic samples: limitations and recommendations for future use
Source: PeerJ journal article supplement (doi:10.7717/peerj.14810), 2023-02-02

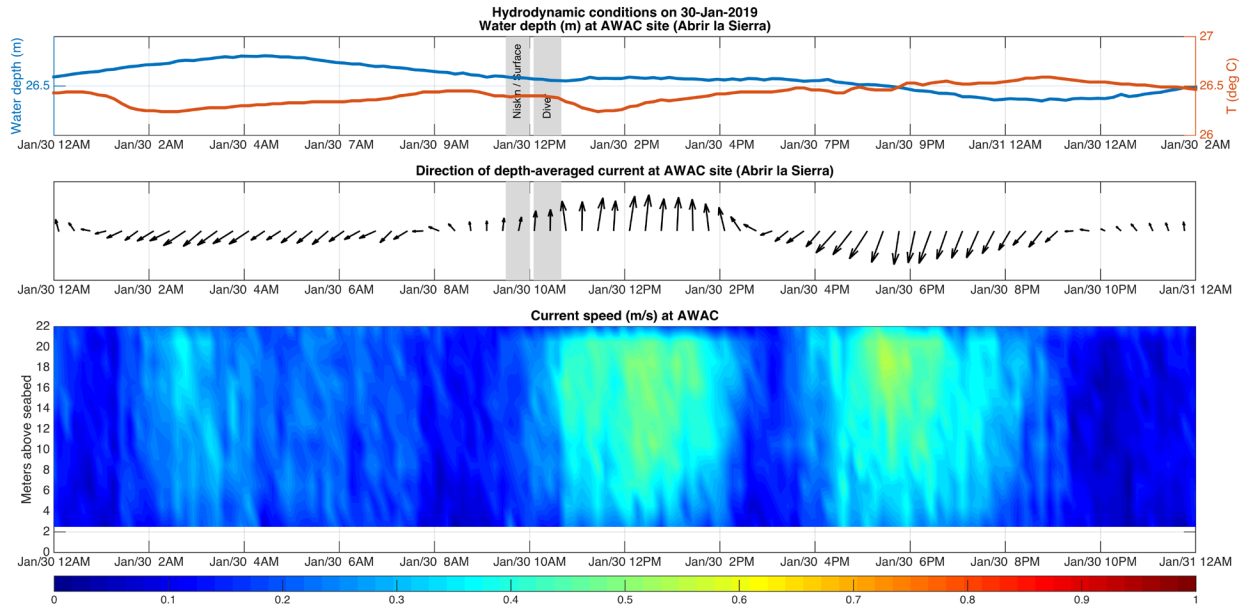

Supplement: Supplementary_Data_Figure_1.pdf [file Supplementary_Data_Figure_1.pdf]
