# Supplementary material for: Using eDNA sampling for species-specific fish detection in tropical oceanic samples: limitations and recommendations for future use
Source: PeerJ journal article supplement (doi:10.7717/peerj.14810), 2023-02-02

Hydrodynamic conditions on 27-Apr-2019  
Water depth (m) at AWAC site (Parguera)

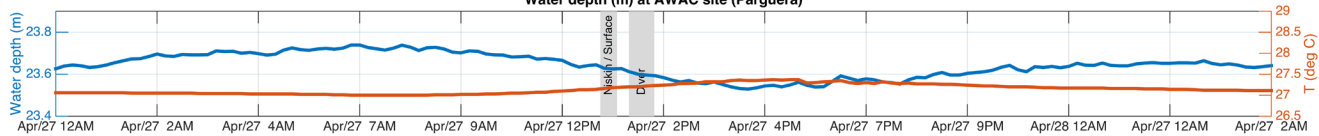

Direction of depth-averaged current at AWAC site (Parguera)

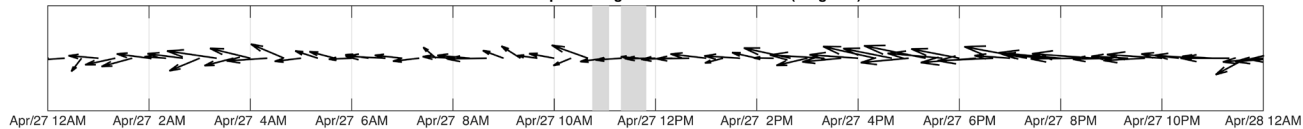

Current speed (m/s) at AWAC

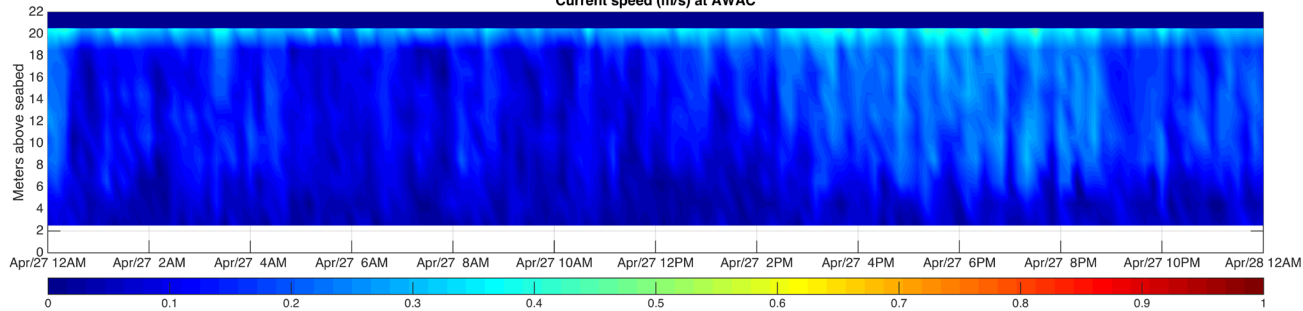

Supplement: Supplementary_Data_Figure_3.pdf [file Supplementary_Data_Figure_3.pdf]
